# Supplementary material for: Activins as Dual Specificity TGF-β Family Molecules: SMAD-Activation via Activin- and BMP-Type 1 Receptors
Source: MDPI journal article supplement (doi:10.3390/biom10040519), 2020-03-29
Supplement: s1 [file s1]

# Activins as dual specificity TGF- $\beta$ family molecules: SMAD-activation via activin- and BMP-type I receptors

Olsen OE, *et al.*

## Supplementary Material

Figure S1. Effects of knockdown of activin/TGF- $\beta$  type 1 receptors in INA-6 myeloma cells

Figure S2. Effects of ALK2 knockdown in HepG2 cells

Figure S3. Activin-induced SMAD activity was not caused by an autocrine TGF- $\beta$  loop

Table S1. Approved HUGO gene names for TGF- $\beta$  family receptors

Table S2. TGF- $\beta$ /SMAD inhibitors; reported inhibitory potential

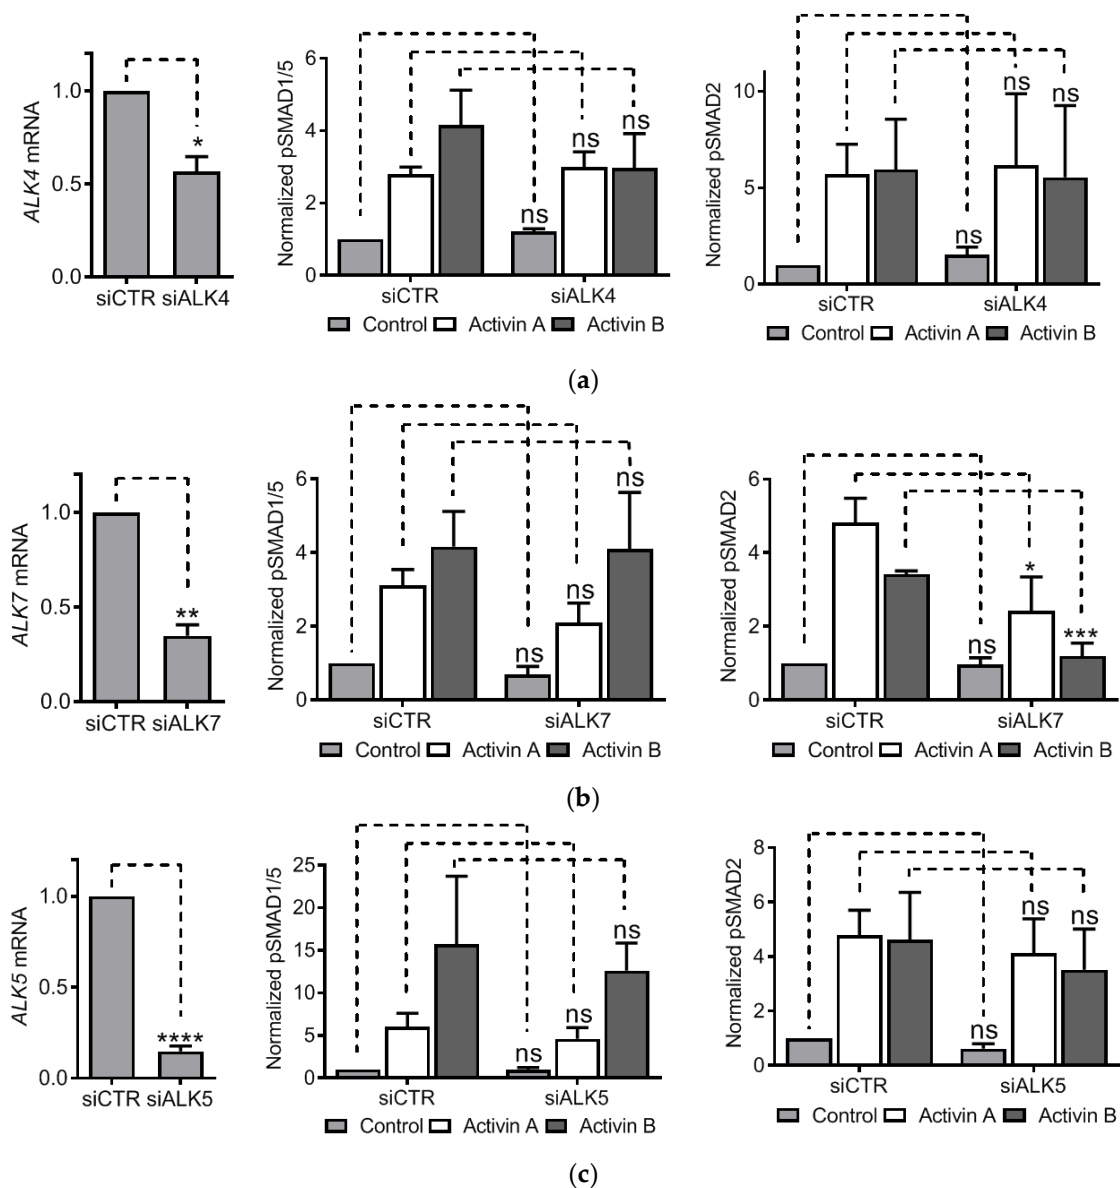

**Figure S1.** Effects of knockdown of activin/TGF- $\beta$  type 1 receptors in INA-6 myeloma cells. To check for a possible involvement of the activin/TGF- $\beta$  type 1 receptors ALK4, ALK7, or ALK5 in activin-induced activation of the two different SMAD branches, we did transient knockdown with siRNA targeting these receptors in INA-6 myeloma cells. The cells were treated 2 days post transfection with activin A (50 ng/mL) or activin B (10 ng/mL) for 2 hours. ALK4, ALK7 or ALK5 mRNA levels (a-c, left) were measured by PCR using the comparative Ct method and *GAPDH* as housekeeping gene. The graph represents mean $\pm$ s.e.m. of n=3 independent experiments. Two-tailed, paired *t*-test was performed (\* $P$  $\leq$ 0.05, \*\* $P$  $\leq$ 0.01, \*\*\*\* $P$  $\leq$ 0.0001). The effect of reduced ALK4, ALK7, or ALK5 mRNA on relative activin A- or activin B-induced activation of SMAD1/5 (a-c, middle) or SMAD2 (a-c, right) was calculated based on signal intensities of the SMADs and *GAPDH* for normalization. The graphs represent mean $\pm$ s.e.m. of n=3 independent experiments. Two-way ANOVA, Bonferroni's multiple comparisons test was performed (\* $P$  $\leq$ 0.05, \*\*\*\* $P$  $\leq$ 0.001, ns (not significant)  $P$ >0.05).

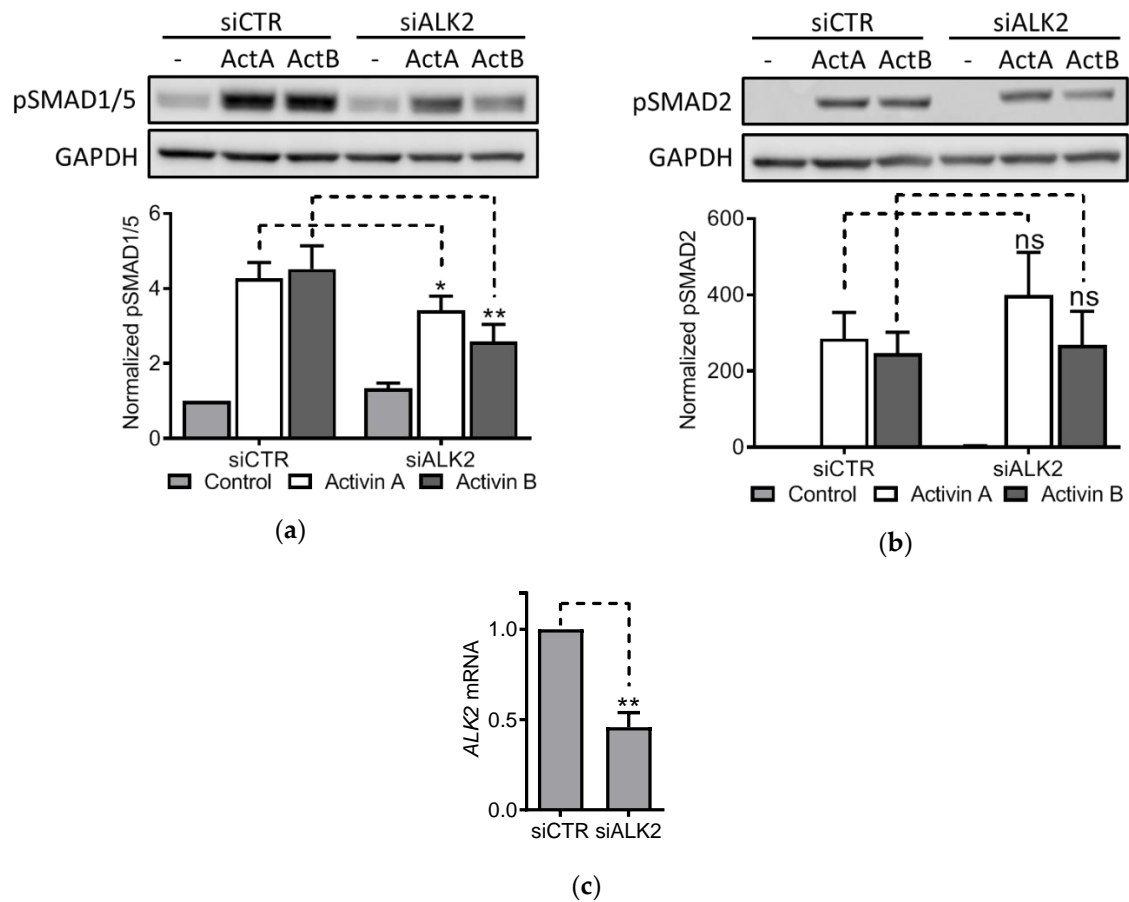

**Figure S2.** Effects of ALK2 knockdown in HepG2 cells. To check for a possible involvement of the BMP type 1 receptor ALK2 in activin-induced activation of the two different SMAD branches, we did transient knockdown with siRNA targeting ALK2 in HepG2 cells. The cells were treated the day after transfection with activin A (20 ng/mL) or activin B (60 ng/mL) for 1 hour. The effect of reduced ALK2 mRNA on relative activin A- or activin B-induced activation of SMAD1/5 (a) or SMAD2 (b) was calculated based on signal intensities of the SMADs and GAPDH for normalization. The graphs represent mean $\pm$ s.e.m. of n=5 independent experiments. Two-way ANOVA, Bonferroni's multiple comparisons test was performed (\* $P\leq 0.05$ , \*\* $P\leq 0.01$ , ns (not significant)  $P>0.05$ ). (c) ALK2 mRNA levels were measured by PCR using the comparative Ct method and GAPDH as housekeeping gene. The graph represents mean $\pm$ s.e.m. of n=5 independent experiments. A two-tailed, paired *t*-test was performed (\*\* $P\leq 0.01$ ).

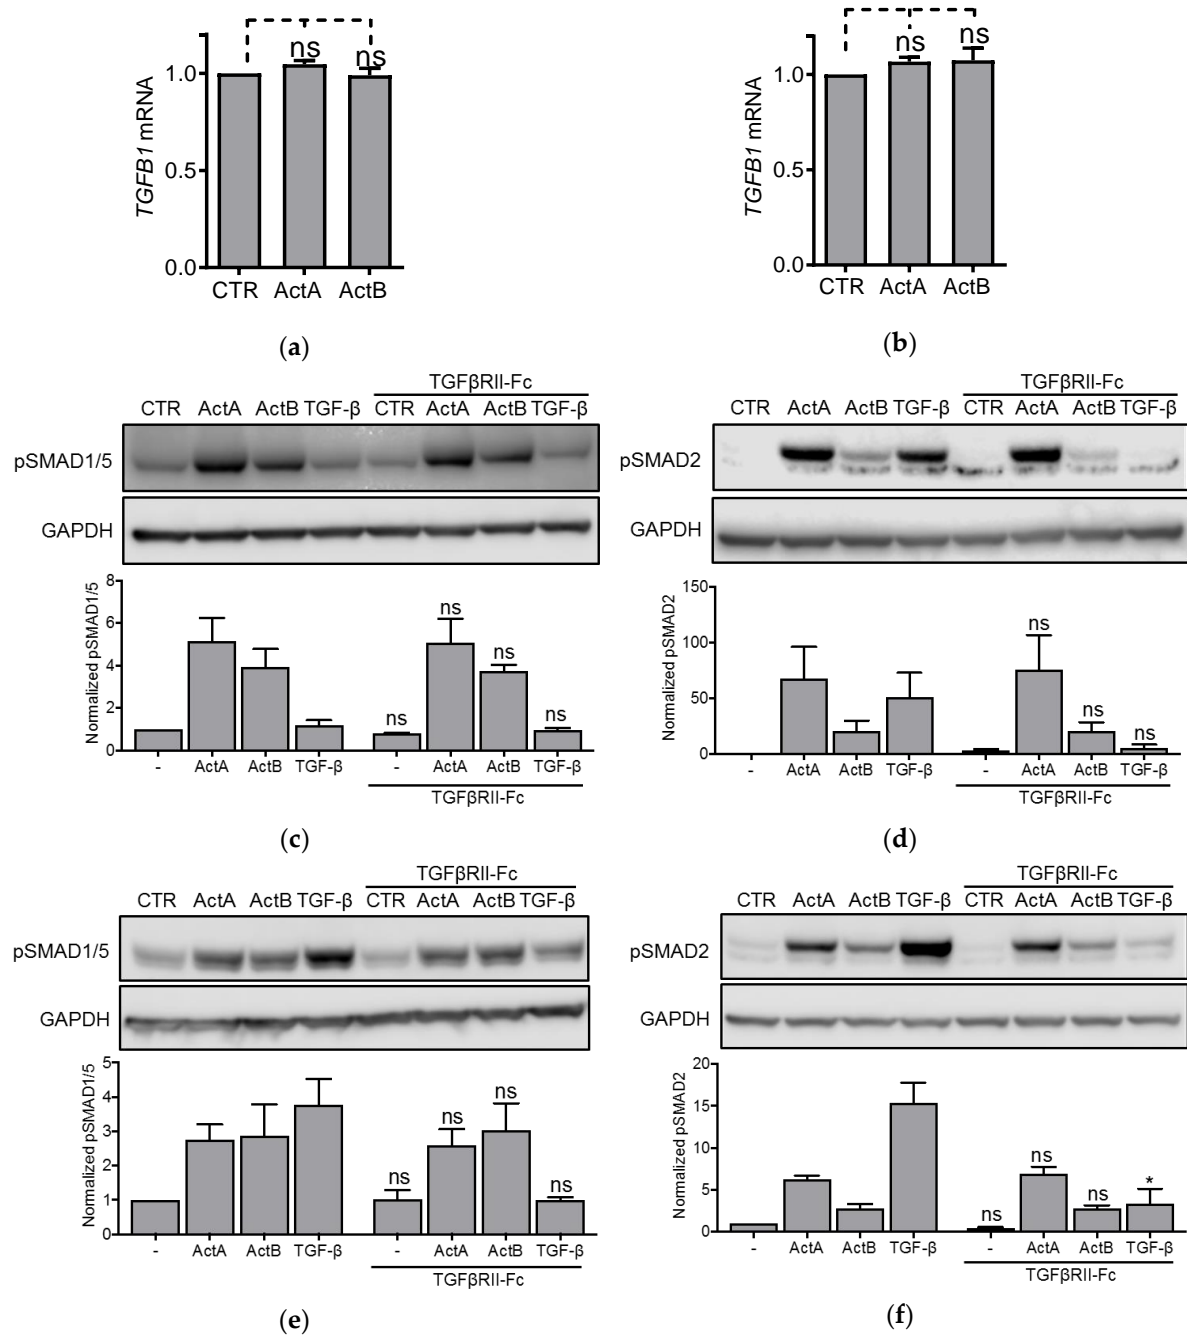

**Figure S3.** Actin-induced SMAD activity was not caused by an autocrine TGF- $\beta$  loop. IH-1 (a) and INA-6 (b) cells were treated with activin A (20 ng/mL for IH-1 and 50 ng/mL for INA-6) and activin B (4 ng/mL for IH-1 and 10 ng/mL for INA-6) for 4 h and *TGF $\beta$ 1* mRNA was measured by PCR using the comparative Ct method and *GAPDH* as housekeeping gene. The graphs represent mean  $\pm$  s.e.m. of  $n=3$  independent experiments. One-way ANOVA, Dunnett's multiple comparisons test was performed (ns (not significant)  $P>0.05$ ). IH-1 cells were treated for 1 h with activin A (20 ng/mL), activin B (4 ng/mL) or TGF- $\beta$  (5 ng/mL) with or without soluble TGF $\beta$ RII-Fc (10  $\mu$ g/mL) to look for a possible contribution of TGF- $\beta$  activity on activation of SMAD1/5 (c) or SMAD2 (d). INA-6 cells were treated for 1 h with activin A (50 ng/mL), activin B (10 ng/mL) or TGF- $\beta$  (0.5 ng/mL) with or without soluble TGF $\beta$ RII-Fc (10  $\mu$ g/mL) to look for a possible contribution of TGF- $\beta$  activity on activation of SMAD1/5 (e) or SMAD2 (f). The graphs represent mean  $\pm$  s.e.m. of  $n=3$  independent experiments. Two-way ANOVA, Bonferroni's multiple comparisons test was performed (\* $P\leq 0.05$ , ns (not significant)  $P>0.05$ ).

**Table S1.** Approved HUGO gene names for TGF- $\beta$  family receptors

| <b>Alias name</b> | <b>Approved symbol</b> | <b>Approved name</b>                        |
|-------------------|------------------------|---------------------------------------------|
| ALK1              | ACVRL1                 | activin A receptor like type 1              |
| ALK2              | ACVR1                  | activin A receptor type 1                   |
| ALK3              | BMPR1A                 | bone morphogenetic protein receptor type 1A |
| ALK4              | ACVR1B                 | activin A receptor type 1B                  |
| ALK5              | TGFB1                  | transforming growth factor beta receptor 1  |
| ALK6              | BMPR1B                 | bone morphogenetic protein receptor type 1B |
| ALK7              | ACVR1C                 | activin A receptor type 1C                  |
| ActRIIA           | ACVR2A                 | activin A receptor type 2A                  |
| ActRIIB           | ACVR2B                 | activin A receptor type 2B                  |
| BMPRII            | BMPR2                  | bone morphogenetic protein receptor type 2  |
| TGF $\beta$ RII   | TGFB2                  | transforming growth factor beta receptor 2  |
| AMHRII            | AMHR2                  | anti-Mullerian hormone receptor type 2      |

Gene symbols and names of TGF- $\beta$  family receptors as approved by the HUGO gene nomenclature committee (HGNC, <https://www.genenames.org/>).

**Table S2.** TGF- $\beta$ /SMAD inhibitors; reported inhibitory potential.

| Name       | BMP Type 1 receptors |      |      |      | Activin/TGF- $\beta$ Type 1 receptors |      |      |
|------------|----------------------|------|------|------|---------------------------------------|------|------|
|            | ALK1                 | ALK2 | ALK3 | ALK6 | ALK4                                  | ALK7 | ALK5 |
| K02288     | ++++                 | ++++ | +++  | ++++ | ++                                    |      | ++   |
| ML347      | +++                  | +++  | -    |      |                                       |      |      |
| LDN-193189 |                      | ++++ | +++  | ++   | ++                                    |      | ++   |
| SB431542   |                      |      |      |      | +                                     | +    | ++   |
| RepSox     |                      |      |      |      |                                       |      | ++++ |
| ZC-47-C95  | -                    | -    | -    | -    |                                       |      | ++   |

The information on IC<sub>50</sub> values for K02288, ML347, LDN-193189, SB431542, and RepSox was retrieved from various sources.(1-5) ZC-47-C95 was resynthesized compound 18a (6) retrieved from Novartis. "+" indicates IC<sub>50</sub> values between 1-10  $\mu$ M, "++"; between 0.1-1  $\mu$ M, "+++"; between 0.01-0.1  $\mu$ M, "++++"; between 0.001-0.01  $\mu$ M, and "-" >10  $\mu$ M.

## References

1. Vogt, J., Traynor, R., and Sapkota, G. P. (2011) The specificities of small molecule inhibitors of the TGFs and BMP pathways. *Cell Signal* **23**, 1831-1842
2. Inman, G. J., Nicolas, F. J., Callahan, J. F., Harling, J. D., Gaster, L. M., Reith, A. D., Laping, N. J., and Hill, C. S. (2002) SB-431542 is a potent and specific inhibitor of transforming growth factor-beta superfamily type I activin receptor-like kinase (ALK) receptors ALK4, ALK5, and ALK7. *Molecular pharmacology* **62**, 65-74
3. Gellibert, F., Woolven, J., Fouchet, M. H., Mathews, N., Goodland, H., Lovegrove, V., Laroze, A., Nguyen, V. L., Sautet, S., Wang, R., Janson, C., Smith, W., Krysa, G., Boullay, V., De Gouville, A. C., Huet, S., and Hartley, D. (2004) Identification of 1,5-naphthyridine derivatives as a novel series of potent and selective TGF-beta type I receptor inhibitors. *Journal of medicinal chemistry* **47**, 4494-4506
4. Engers, D. W., Frist, A. Y., Lindsley, C. W., Hong, C. C., and Hopkins, C. R. (2013) Synthesis and structure-activity relationships of a novel and selective bone morphogenetic protein receptor (BMP) inhibitor derived from the pyrazolo[1.5-a]pyrimidine scaffold of dorsomorphin: the discovery of ML347 as an ALK2 versus ALK3 selective MLPCN probe. *Bioorganic & medicinal chemistry letters* **23**, 3248-3252
5. Sanvitale, C. E., Kerr, G., Chaikuad, A., Ramel, M. C., Mohedas, A. H., Reichert, S., Wang, Y., Triffitt, J. T., Cuny, G. D., Yu, P. B., Hill, C. S., and Bullock, A. N. (2013) A new class of small molecule inhibitor of BMP signaling. *PLoS One* **8**, e62721
6. Jin, C. H., Sreenu, D., Krishnaiah, M., Subrahmanyam, V. B., Rao, K. S., Nagendra Mohan, A. V., Park, C. Y., Son, J. Y., Son, D. H., Park, H. J., Sheen, Y. Y., and Kim, D. K. (2011) Synthesis and biological evaluation of 1-substituted-3(5)-(6-methylpyridin-2-yl)-4-(quinoxalin-6-yl)pyrazoles as transforming growth factor-beta type 1 receptor kinase inhibitors. *Eur J Med Chem* **46**, 3917-3925
